# Supplementary material for: Ionic conductivity of deep eutectic solvents: the role of orientational dynamics and glassy freezing
Source: Royal Society of Chemistry journal article supplement (doi:10.1039/c9cp00742c), 2019-01-01
Supplement: c9cp00742c1.pdf [file c9cp00742c1.pdf]

## Electronic supplementary information

for

# Ionic conductivity of deep eutectic solvents: The role of orientational dynamics and glassy freezing

Daniel Reuter, Catharina Binder, Peter Lunkenheimer\* and Alois Loidl

*Experimental Physics V, Center for Electronic Correlations and Magnetism, University of Augsburg, 86135 Augsburg, Germany.*

\* Corresponding author. E-mail: [peter.lunkenheimer@physik.uni-augsburg.de](mailto:peter.lunkenheimer@physik.uni-augsburg.de)

### DSC results

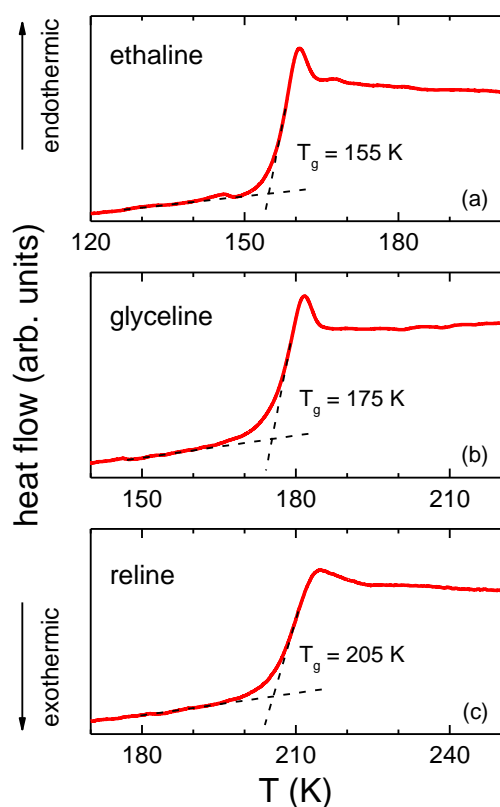

Fig. S1 DSC results on the three DESSs treated in the present work as obtained under heating with 10 K/min.

Figure S1 shows the temperature-dependent DSC heat flow for the three investigated DESSs. The glass temperatures were estimated by the onset method as indicated by the dashed lines.
